# Supplementary material for: A combined clinical and genetic model for predicting risk of ovarian cancer
Source: PubMed Central journal article supplement — Eur J Cancer Prev. 2022 Oct 27;32(1):57–64. doi: 10.1097/CEJ.0000000000000771 (PMC9746333; doi:10.1097/cej.0000000000000771), 2022-10-27
Supplement: ejcp-32-57-s001.pdf [file ejcp-32-57-s001.pdf]

# Supplementary material: A combined clinical and genetic model for predicting risk of ovarian cancer

## Supplementary methods

### ***Multiple imputation***

We imputed nine complete datasets (von Hippel, 2020) using chained equations (linear regression for body mass index; logistic regression for ever had a full-term pregnancy, ever taken hormone replacement therapy and ever taken hormonal birth control; Poisson regression for number of full-term pregnancies; predictive mean matching (with 5 nearest neighbours) for duration of hormonal birth control use, age at menopause and duration of hormone replacement therapy use). Including the menopausal status variable in the multiple imputation introduced problems with perfect prediction of age at menopause; therefore, for the 22,670 (12.0%) unaffected women and 75 (10.6%) affected women with missing menopausal status, we considered women aged 50 years or less to be premenopausal and the rest to be postmenopausal before running the imputation.

### ***Polygenic risk score***

To calculate each woman's population-standardised PRS (Mealiffe et al., 2010, Conran et al., 2016), we first calculated the unscaled population average risk ( $\mu$ ) for each SNP as  $\mu = (1 - p)^2 + 2p(1 - p)OR + p^2OR^2$ , where  $p$  is the risk allele frequency and  $OR$  is the odds ratio per effect allele. Next, for each of the 36 SNPs, each woman's adjusted risk was calculated as  $\frac{OR^N}{\mu}$ , where  $N$  was the woman's number of effect alleles (missing SNPs were given an adjusted risk of 1). This ensured that each SNP's adjusted risk had a population mean equal to 1. Finally, the 36-SNP PRS (*snprisk*, as a relative risk) for each woman was the product of their adjusted risks for each of the SNPs.

### **Clinical risk score**

The clinical risk score from Li et al. (2015) (as a relative risk) was calculated as  $clinrisk = e^{(0.019 \times menop + 0.034 \times menopage + 0.086 \times hrt + 0.057 \times hrtime - 0.181 \times hbc - 0.034 \times hbctime - 0.308 \times birth - 0.094 \times birthn + 0.021 \times bmi)}$ , where *menop*, *hrt*, *hbc* and *birth* were indicator variables for being menopausal, ever taking hormone replacement therapy, ever taking hormonal birth control and ever having had a full-term pregnancy, respectively. The *menopage* variable was age in years at menopause minus 50 for menopausal women and 0 for premenopausal women; *hrtime* was years of hormone replacement therapy use minus 2.5 for women who had taken hormone replacement therapy and 0 for women who had not; *hbctime* was years of hormonal birth control use minus 5 for women who had taken hormonal birth control and 0 for women who had not; *birthn* was number of full-term pregnancies minus 2 for parous women and 0 for non-parous women; *bmi* was body mass index (kg/m<sup>2</sup>). We did not include the clinical model's term for having had one ovary removed because, in the UK Biobank, some of these women were unable to be distinguished from women with both ovaries removed; therefore, all women with a history of ovary removal were excluded from our analysis dataset. As a final step, we divided the clinical risk score by its mean to ensure that the mean clinical risk was equal to 1, that is,  $clinrisk\_c = \frac{clinrisk}{1.236909}$ .

### **Combined risk score**

To create the combined risk score, we multiplied the PRS by the centred clinical risk score:  $comrisk = snprisk \times clinrisk\_c$ .

### **Absolute risks**

For the calculation of 10-year risk for each woman (aged *b* years at her baseline assessment date), we first determined her population incidence from birth to age *b* years (*popincid*) and to age *b* + 10 years (*popincid10*). For each risk score (e.g. *comrisk*), we then

calculated each woman's cumulative risks to age  $b$  years and age  $b + 10$  years as:  $cumul = 1 - e^{-combrisk \times popincid}$  and  $cumul10 = 1 - e^{-combrisk \times popincid10}$ , respectively. For each woman, her expected survival in the next 10 years was  $surv10 = e^{-mort10}$ , where  $mort10$  was her expected mortality in the next 10 years. The 10-year absolute risk of ovarian cancer was then calculated as  $absrisk10yr = \frac{(cumul10 - cumul) \times surv10}{(1 - cumul)}$ .

For the recalibrated risk score ( $newrisk$ ), we also calculated the full-lifetime risk for each woman as  $fulliferisk = 1 - e^{newrisk \times popincidlifc}$ , where  $popincidlifc$  was her cumulative incidence of ovarian cancer from birth to age 85 years.

## Supplementary tables

Supplementary Table 1. Eligibility criteria for the current study

| <b>N eligible</b> | <b>Criteria</b>                                         | <b>N dropped</b> |
|-------------------|---------------------------------------------------------|------------------|
| 502,413           | Active UK Biobank participants (at 22 February 2022)    |                  |
| 273,185           | Female and reported sex same as genetic sex             | 228,850          |
| 271,630           | Aged 40–69 years at baseline assessment date            | 1555             |
| 219,894           | Caucasian                                               | 51,736           |
| 219,039           | No ovarian cancer at baseline assessment date           | 855              |
| 198,592           | Have both ovaries at baseline assessment                | 20,447           |
| 198,256           | Genotyping data available                               | 336              |
| 198,247           | Alive after six weeks of follow-up                      | 9                |
| 198,244           | No ovarian cancer after six weeks of follow-up          | 3                |
| 189,171           | Unrelated individuals ( $\geq 3$ rd degree relatedness) | 9073             |

Supplementary Table 2. Number of single-nucleotide polymorphisms genotyped for unaffected and affected women

| <b>Number of SNPs genotyped</b> | <b>Unaffected</b> |          | <b>Affected</b> |          |
|---------------------------------|-------------------|----------|-----------------|----------|
|                                 | <b>N</b>          | <b>%</b> | <b>N</b>        | <b>%</b> |
| 32                              | 4                 | 0.0      | 0               | 0.0      |
| 33                              | 229               | 0.1      | 0               | 0.0      |
| 34                              | 3479              | 1.9      | 21              | 3.0      |
| 35                              | 33,002            | 17.5     | 123             | 17.3     |
| 36                              | 151,746           | 80.5     | 567             | 79.8     |

Note: SNP, single-nucleotide polymorphism

Supplementary Table 3. Baseline risk factors used in the clinical risk score for women who were unaffected and affected with ovarian cancer

| Categorical risk factors                             | Unaffected |      | Affected |      |
|------------------------------------------------------|------------|------|----------|------|
|                                                      | N          | %    | N        | %    |
| Number of full-term pregnancies                      |            |      |          |      |
| 0                                                    | 34,356     | 18.2 | 141      | 19.8 |
| 1                                                    | 24,658     | 13.1 | 103      | 14.5 |
| 2                                                    | 85,423     | 45.3 | 309      | 43.5 |
| 3                                                    | 33,286     | 17.7 | 124      | 17.4 |
| 4                                                    | 8209       | 4.4  | 27       | 3.8  |
| 5+                                                   | 2418       | 1.3  | 7        | 1.0  |
| Missing                                              | 110        | 0.1  | 0        | 0.0  |
| Hormonal birth control, ever used                    |            |      |          |      |
| No                                                   | 37,979     | 20.2 | 209      | 29.4 |
| Yes                                                  | 150,164    | 79.7 | 499      | 70.2 |
| Missing                                              | 317        | 0.2  | 3        | 0.4  |
| Menopause                                            |            |      |          |      |
| No                                                   | 45,653     | 24.2 | 105      | 14.8 |
| Yes                                                  | 120,137    | 63.8 | 531      | 74.7 |
| Missing                                              | 22,670     | 12.0 | 75       | 10.6 |
| Hormone replacement therapy, ever used               |            |      |          |      |
| No                                                   | 128,016    | 67.9 | 430      | 60.5 |
| Yes                                                  | 59,990     | 31.8 | 281      | 39.5 |
| Missing                                              | 454        | 0.2  | 0        | 0.0  |
| Continuous risk factors                              | Unaffected |      | Affected |      |
|                                                      | Mean       | SD   | Mean     | SD   |
| Body mass index (kg/m <sup>2</sup> )                 | 26.9       | 5.1  | 27.4     | 5.1  |
| Duration of hormonal birth control use (years)*      | 10.6       | 7.5  | 8.7      | 6.9  |
| Age at menopause (years)*                            | 49.9       | 4.9  | 50.2     | 5.0  |
| Duration of hormone replacement therapy use (years)* | 7.4        | 5.2  | 8.1      | 5.3  |

Note: SD, standard deviation; \* in women who answered yes to the corresponding indicator question.

Supplementary Table 4. Refined estimates for the final model using the PRS and clinical risk score in the full dataset

| Relative risk score                          | ln HR | 95% CI       | P value |
|----------------------------------------------|-------|--------------|---------|
| ln PRS ( <i>snprisk</i> )                    | 0.898 | 0.673, 1.124 | <0.001  |
| ln clinical risk score ( <i>clinrisk_c</i> ) | 0.454 | 0.260, 0.647 | <0.001  |

Note: CI, confidence interval; HR, hazard ratio; ln, natural logarithm; PRS, polygenic risk score; SNP, single-nucleotide polymorphism.

For the final model, the relative risk is calculated as follows:

$$finalrisk = e^{0.898 \times \ln(snprisk) + 0.454 \times \ln(clinrisk_c)},$$

where *snprisk* and *clinrisk\_c* are calculated as described in the Supplementary Methods. This can then be used with appropriate population incidence rates to calculate the 10-year (or *n*-year) risk or full-lifetime risk of ovarian cancer, as described in the Methods.

## Supplementary figure

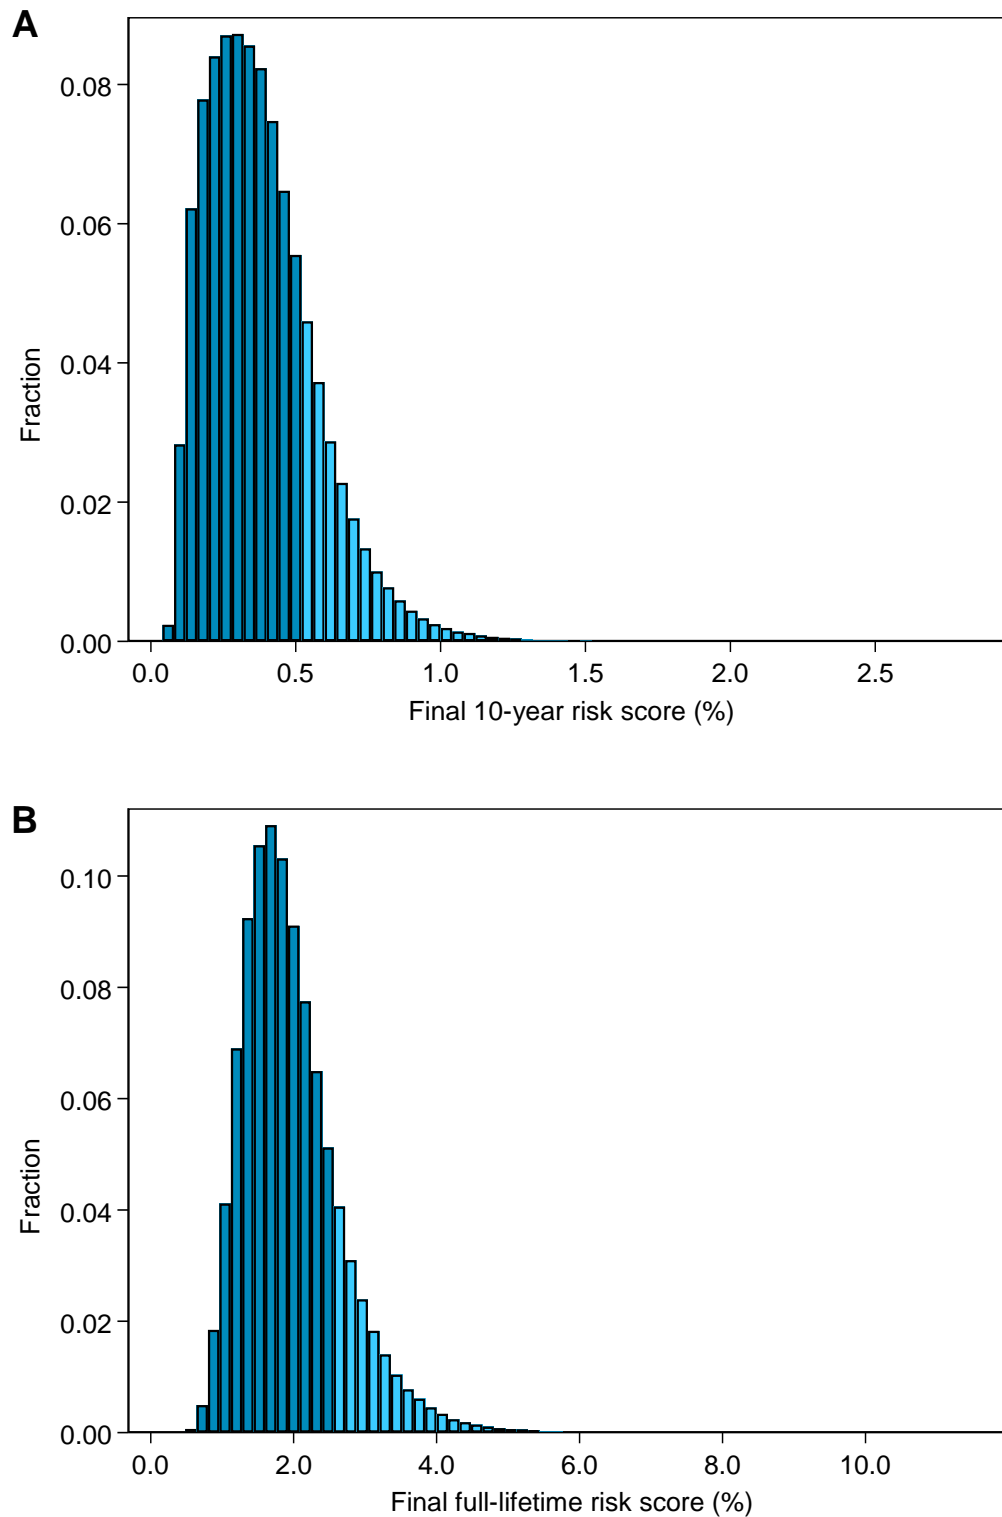

Supplementary Figure 1. Distribution of the final (A) 10-year risk score and (B) full-lifetime risk score in the full dataset. The light-blue sections correspond to the top quintile of risk. For the 10-year risk, the median is 0.3%, and for the full-lifetime risk, the median is 1.8%.

## Supplementary references

Conran CA, Na R, Chen H, Jiang D, Lin X, Zheng SL et al. (2016). Population-standardized genetic risk score: the SNP-based method of choice for inherited risk assessment of prostate cancer. *Asian J Androl* **18**(4):520-524. doi: 10.4103/1008-682X.179527.

Li K, Husing A, Fortner RT, Tjønneland A, Hansen L, Dossus L et al. (2015). An epidemiologic risk prediction model for ovarian cancer in Europe: the EPIC study. *Br J Cancer* **112**(7):1257-1265. doi: 10.1038/bjc.2015.22.

Mealiffe ME, Stokowski RP, Rhees BK, Prentice RL, Pettinger M, Hinds DA (2010). Assessment of clinical validity of a breast cancer risk model combining genetic and clinical information. *J Natl Cancer Inst* **102**(21):1618-1627. doi: 10.1093/jnci/djq388.

von Hippel PT (2020). How many imputations do you need? A two-stage calculation using a quadratic rule. *Sociological Methods and Research* **49**(3):699-718. doi: 10.1177/0049124117747303.
